# Supplementary material
Source: publisher site journal article supplement (https://www.spandidos-publications.com/1646/downloadSupplementary)
Supplement: Supplementary file 1 [file downloadSupplementary]

## Sheet: Sheet1
Table SI. Age distribution of patients with HSILs and LSILs.
Age in years	HSIL	LSIL	P-valuea
Min	25	23
Max	57	62
Mean	38.7±8.3	42.4±11.5	0.0642
Age groups, %
25-30	23	19
31-40	36	31
41-50	30	19
51-60	11	25
61-70	0	6
Total, n (%)	66 (100)	36 (100)
aTwo-tailed upaired Student’s t-test was used to calculate the P-value. The mean walue represents mean+SD (Standard Deviation). HSIL, high-grade squamous intraepithelial lesion; LSIL, low-grade SIL.
